# Supplementary material for: Genome-Wide Analysis of Factors Affecting Transcription Elongation and DNA Repair: A New Role for PAF and Ccr4-Not in Transcription-Coupled Repair
Source: PubMed Central journal article supplement (PMC2629578; doi:10.1371/journal.pgen.1000364), 2009-02-06
Supplement: pgen.1000364.s005.pdf [file pgen.1000364.s005.pdf]

## Supplementary Table S4

| ORF       | Name  | %INH MIC | Screen<br>Daignan-<br>Fornier B. | GLAM ratio<br>PHO5-<br>lacZ/PHO5 | GLAM ratio<br>PHO5-<br>LAC4/PHO5 |
|-----------|-------|----------|----------------------------------|----------------------------------|----------------------------------|
| YIR016W   |       | 95,83    | No                               | 0.52                             | 0.73                             |
| YCR053W   | THR4  | 89,09    | No                               | n.d.                             | n.d.                             |
| YHL031C   | GOS1  | 88,95    | No                               | n.d.                             | n.d.                             |
| YGR018C   |       | 88,80    | No                               | 1.16                             | 0.88                             |
| YBR081C   | SPT7  | 88,57    | Yes                              | 0.59                             | 0.67                             |
| YBR101C   | FES1  | 88,54    | No                               | 0.51                             | 0.72                             |
| YML008C   | ERG6  | 88,12    | Yes                              | n.d.                             | n.d.                             |
| YOR184W   | SER1  | 88,11    | Yes                              | n.d.                             | n.d.                             |
| YER051W   | JHD1  | 88,00    | No                               | 0.85                             | 1.13                             |
| YER083C   | RMD7  | 87,85    | No                               | 0.85                             | 0.96                             |
| YOL148C   | SPT20 | 87,79    | Yes                              | <b>0.16</b>                      | <b>0.29</b>                      |
| YDR483W   | KRE2  | 87,65    | No                               | n.d.                             | n.d.                             |
| YJL140W   | RPB4  | 86,99    | Yes                              | <b>0.03</b>                      | <b>0.08</b>                      |
| YHR025W   | THR1  | 86,74    | Yes                              | n.d.                             | n.d.                             |
| YGL244W   | RTF1  | 86,69    | Yes                              | <b>0.30</b>                      | <b>0.34</b>                      |
| YBL058W   | SHP1  | 86,34    | Yes                              | 0.57                             | <b>0.46</b>                      |
| YGL070C   | RPB9  | 86,12    | Yes                              | <b>0.46</b>                      | <b>0.49</b>                      |
| YMR272C   | SCS7  | 86,05    | No                               | 0.86                             | 0.94                             |
| YLR055C   | SPT8  | 85,83    | Yes                              | 0.86                             | 0.63                             |
| YGL042C   |       | 85,77    | Yes                              | 0.66                             | 0.82                             |
| YER052C   | HOM3  | 85,48    | No                               | n.d.                             | n.d.                             |
| YGR208W   | SER2  | 85,29    | Yes                              | n.d.                             | n.d.                             |
| YNL229C   | URE2  | 84,21    | No                               | 0.94                             | 0.51                             |
| YML112W   | CTK3  | 84,13    | Yes                              | 1.38                             | 0.88                             |
| YDR392W   | SPT3  | 83,55    | Yes                              | <b>0.41</b>                      | <b>0.47</b>                      |
| YDL074C   | BRE1  | 83,10    | Yes                              | <b>0.37</b>                      | <b>0.47</b>                      |
| YKL212W   | SAC1  | 82,99    | Yes                              | n.d.                             | n.d.                             |
| YLR226W   | BUR2  | 81,97    | No                               | <b>0.08</b>                      | <b>0.30</b>                      |
| YDR158W   | HOM2  | 81,86    | Yes                              | n.d.                             | n.d.                             |
| YGL012W   | ERG4  | 81,69    | Yes                              | n.d.                             | n.d.                             |
| YBR097W   | VPS15 | 81,62    | Yes                              | n.d.                             | n.d.                             |
| YOL051W   | MED15 | 81,51    | No                               | <b>0.38</b>                      | <b>0.40</b>                      |
| YJR139C   | HOM6  | 81,46    | Yes                              | n.d.                             | n.d.                             |
| YMR202W   | ERG2  | 81,32    | No                               | n.d.                             | n.d.                             |
| YGL043W   | DST1  | 81,28    | Yes                              | 0.62                             | 0.85                             |
| YIR014W   |       | 81,26    | No                               | 0.81                             | 1.02                             |
| YBR200W   | BEM1  | 81,13    | Yes                              | n.d.                             | n.d.                             |
| YAL035W   | FUN12 | 80,88    | Yes                              | <b>0.43</b>                      | 0.75                             |
| YDR207C   | UME6  | 80,11    | No                               | 0.84                             | 0.99                             |
| YPR072W   | NOT5  | 78,23    | No                               | <b>0.25</b>                      | <b>0.36</b>                      |
| YGL038C   | OCH1  | 78,06    | Yes                              | n.d.                             | n.d.                             |
| YCR081W   | MED12 | 77,00    | No                               | 0.59                             | 0.60                             |
| YLR337C   | VRP1  | 76,37    | Yes                              | 0.67                             | 0.64                             |
| YPL230W   |       | 76,15    | No                               | <b>0.43</b>                      | <b>0.48</b>                      |
| YPL055C   | LGE1  | 74,43    | No                               | 0.54                             | <b>0.41</b>                      |
| YMR304W   | UBP15 | 73,65    | No                               | <b>0.44</b>                      | 1.08                             |
| YER014C-A | BUD25 | 73,23    | No                               | n.d.                             | n.d.                             |
| YNL139C   | THO2  | 73,14    | No                               | <b>0.04</b>                      | <b>0.13</b>                      |
| YOL086C   | ADH1  | 72,96    | No                               | n.d.                             | n.d.                             |
| YLR148W   | PEP3  | 72,03    | Yes                              | n.d.                             | n.d.                             |

## Supplementary Table S4

|         |       |       |     |             |             |
|---------|-------|-------|-----|-------------|-------------|
| YGR063C | SPT4  | 71,33 | No  | <b>0.14</b> | <b>0.13</b> |
| YDL005C | MED2  | 69,67 | No  | <b>0.31</b> | <b>0.35</b> |
| YPL045W | VPS16 | 68,87 | No  | n.d.        | n.d.        |
| YBR069C | TAT1  | 68,72 | Yes | n.d.        | n.d.        |
| YER014W | HEM14 | 68,64 | No  | n.d.        | n.d.        |
| YLR418C | CDC73 | 68,08 | No  | <b>0.23</b> | 0.56        |
| YAL016W | TPD3  | 67,99 | No  | <b>0.35</b> | 0.58        |
| YGL058W | RAD6  | 67,00 | Yes | 0.56        | <b>0.44</b> |
| YGR204W | ADE3  | 66,19 | No  | n.d.        | n.d.        |
| YHL025W | SNF6  | 66,16 | Yes | 0.82        | 0.59        |
| YLR338W | OPI9  | 65,60 | Yes | n.d.        | n.d.        |
| YER086W | ILV1  | 65,07 | Yes | n.d.        | n.d.        |
| YJL175W |       | 63,58 | Yes | 0.74        | 1.24        |
| YLR056W | ERG3  | 61,95 | Yes | n.d.        | n.d.        |
| YDR320C | SWA2  | 61,93 | No  | n.d.        | n.d.        |
| YDL100C | ARR4  | 61,56 | Yes | n.d.        | n.d.        |
| YMR231W | PEP5  | 61,34 | Yes | n.d.        | n.d.        |
| YOR036W | PEP12 | 59,45 | Yes | n.d.        | n.d.        |
| YCL007C | CWH36 | 58,01 | No  | n.d.        | n.d.        |
| YAL021C | CCR4  | 57,71 | No  | <b>0.46</b> | 0.64        |
| YLR318W | EST2  | 57,14 | No  | <b>0.22</b> | <b>0.04</b> |
| YGL223C | COG1  | 56,96 | No  | n.d.        | n.d.        |
| YGR038W | ORM1  | 55,91 | No  | 0.65        | 0.94        |
| YLR239C | LIP2  | 54,93 | No  | 0.77        | <b>0.31</b> |
| YKL139W | CTK1  | 53,85 | Yes | 1.39        | 1.53        |
| YML095C | RAD10 | 53,71 | No  | 0.85        | 1.08        |
| YJR018W |       | 53,63 | Yes | <b>0.10</b> | <b>0.34</b> |
| YKR001C | VPS1  | 52,84 | No  | n.d.        | n.d.        |
| YBR021W | FUR4  | 51,79 | No  | n.d.        | n.d.        |
| YPR160W | GPH1  | 51,06 | No  | n.d.        | n.d.        |
| YDR323C | PEP7  | 51,00 | Yes | n.d.        | n.d.        |
| YAL002W | VPS8  | 50,83 | No  | n.d.        | n.d.        |
| YPL084W | BRO1  | 50,58 | No  | 0.51        | 0.74        |
| YCL008C | STP22 | 50,20 | No  | n.d.        | n.d.        |
